1 **Research article**

2 The widespread misconception about the Japanese major biogeographic boundary, the

3 Watase line (Tokara gap), revealed by bibliographic and beta diversity analyses

4

5 Shohei Komaki<sup>1,2</sup>, Takeshi Igawa<sup>1,3</sup>

6

7 <sup>1</sup>Division of Developmental Science, Graduate School for International Development and

8 Cooperation, Hiroshima University, Higashi-Hiroshima, Hiroshima 739-8529, Japan

9 <sup>2</sup>Division of Biomedical Information Analysis, Iwate Tohoku Medical Megabank

10 Organization, Iwate Medical University, Yahaba, Iwate 028-3694, Japan

11 <sup>3</sup>Amphibian Research Center, Hiroshima University, Higashi-Hiroshima, Hiroshima 739-

12 8526, Japan

13

14 **Email addresses:**

15 Shohei Komaki (komaki@medicalgenome.info)

16 Takeshi Igawa (tigawa@hiroshima-u.ac.jp)

17

18 **Corresponding author:**

19 Shohei Komaki

20 Division of Biomedical Information Analysis, Iwate Tohoku Medical Megabank

21 Organization, Iwate Medical University, Yahaba, Iwate 028-3694, Japan

22 komaki@medicalgenome.info

23 **ABSTRACT**

24 The biota of the Japanese Archipelago is divided into the Palearctic and Oriental realms by  
25 the Watase line (Tokara gap), a major biogeographic boundary of Japan. This boundary is  
26 generally placed between Akusekijima and Kodakarajima Islands of the Tokara Archipelago,  
27 and has been the subject of many biogeographic debates. However, despite being widely  
28 accepted, the position of the boundary is doubtful because of a lack of clear evidence. Here,  
29 to verify the definition and existence of the biogeographic boundary, we performed a  
30 documentary search and beta diversity analysis of multiple taxa. Our documentary search  
31 suggested that the Watase line (Tokara gap) should be put between Yakushima/Tanegashima  
32 and Amamioshima Islands, but recent references to it clearly deviate from its original  
33 definition, and that the placement of the boundary line between Akusekijima and  
34 Kodakarajima Islands is based on limited and biased evidence. Our beta diversity analyses  
35 found no common biogeographic boundary dividing the Tokara Archipelago into two realms,  
36 and showed that the beta diversity pattern of this region is explained by the areas and  
37 geographic distances of the islands in agreement with the general principles of island  
38 biogeography. The widespread misunderstanding of biogeography in this region could have  
39 been perpetuated by preconception and the citation of references without verification. Our  
40 study proposes that revision of the biogeography in the Tokara Archipelago, a gap region  
41 between the Palearctic and Oriental realms, is necessary and demonstrates the negative  
42 influence of preconception in biogeographic debate.

43

44 **Keywords:** avifauna, flora, herpetofauna, insect fauna, island biogeography, land-snail fauna,  
45 Ryukyu Archipelago, Tokara Archipelago (3–10 keywords)

46

47 **BACKGROUND**

48 The similarity of species components between islands often decreases with the geographic  
49 distance between them. This is so-called distance decay, a principle of island biogeography  
50 [1]. Island area is also a significant determinant of island biota (the species–area relationship)  
51 [2,3]. In the case of land-bridge islands, a geohistory involving sea barrier and land-bridge  
52 formation is also an essential factor characterizing the terrestrial and freshwater biota on the  
53 island [4–7].

54 In Japan, there are multiple sea straits whose geohistories seems to have affected the  
55 spatial pattern of biodiversity; the Soya, Tsugaru, Tsushima, Tokara and Kerama straits [8–  
56 11]. In particular, the Tokara strait is a major biogeographic boundary because it divides the  
57 Japanese Archipelago into the Palearctic and Oriental (Indomalaya) realms [10]. This  
58 biogeographic boundary is often referred to as the Watase line [12–14]. Alternatively, the  
59 term ‘Tokara gap’, which is thought to correspond to the Watase line, is often used in  
60 phylogeographic studies [15–18]. In most such studies, this biogeographic or  
61 phylogeographic boundary is usually placed between two islands of the Tokara Archipelago,  
62 Akusekijima (Akuseki) and Kodakarajima (Kodakara) Islands (gap 5 in Fig. 1) [10,19,20]. It  
63 is plausibly explained that migrations of terrestrial and freshwater organisms over the strait  
64 have been limited since the Pliocene throughout glacial cycling because of the deep  
65 submarine canyon 1000 m below sea level between the two islands [16,20–24] that resulted  
66 in the boundary line between the Palearctic and Oriental realms.

67 Several practical studies of beta diversity have demonstrated that the Tokara gap (gap  
68 5 in Fig. 1) significantly contributed to the biogeographic patterns of terrestrial organisms  
69 (Nakamura et al. [20] and Kubota et al. [25] for plant species; Ichikawa et al. [26] for land  
70 snails). However, several species distributed across the Tokara gap are considered to have  
71 achieved overseas dispersal across the boundary (Kurita and Hikida [15] for skinks;  
72 Tominaga et al. [27] for tree frogs). Based on the estimated divergence time between island

73 populations across the Tokara gap, which post-dated the formation of the sea barrier, these  
74 studies concluded that the species dispersed over the sea rather than across a land bridge.

75         Among the abovementioned studies, Ota [9] is the article most frequently referred to  
76 in the context of the Tokara gap. Ota [9] reviewed the biogeography of amphibians and  
77 reptiles in the Ryukyu Archipelago, and put a boundary line for the Tokara gap between  
78 Akuseki and Kodakara Islands in a figure; the idea of this boundary is widely accepted and  
79 referred to today. However, why the Tokara gap was put between the two islands was not  
80 explained in the article or the references therein; thus, it is unclear whether the boundary line  
81 was placed roughly without consideration or on any basis. In addition, a deep submarine  
82 canyon is an essential feature characterizing the Tokara gap, but no such canyon exists  
83 between Akuseki and Kodakara Islands (Fig. 2). The existence of this biogeographic  
84 boundary is, therefore, doubtful despite it being the basis of biogeographic debate in Japan.

85         Here, to understand what the Watase line or Tokara gap is and whether and where it  
86 exists, (1) we revisited the concept of these terms in a documentary search, and (2)  
87 reanalysed the beta diversities of multiple taxa in the Tokara Archipelago and adjacent  
88 islands. Based on the results, we discuss how a biogeographic preconception has spread and  
89 affected biogeographic studies in the last decade.

90

## 91 **METHODS**

### 92 **Document search**

93 Using Google Scholar (<https://scholar.google.co.jp>), we first searched and read journal  
94 articles including original articles, letters, reviews and short notes in which the Watase line  
95 (including Watase's line) or the Tokara gap were mentioned. The Google Scholar search was  
96 performed on November 16 2016 using ["Watase line" OR "Tokara gap"] as keywords.

97 Books, proceedings and theses hit by the Google Scholar search were excluded because few

98 documents of this kind are searchable by Google Scholar and thus they do not represent the  
99 usage trends of these terms. Instead, documents including articles and books that were  
100 referred to as the basis of arguments in any journal articles were checked. Because the term  
101 ‘Watase line’ was coined by Dr. Yaichiro Okada after Dr. Shozaburo Watase [13], we also  
102 checked related articles published by these authors and references contained therein.

103

#### 104 **Biogeographic analyses**

105 Following previous biogeographic studies [20,25,28–30], we used simple and multiple  
106 regression models to understand the beta diversity pattern in the Tokara Archipelago. The  
107 regression models were based on the dissimilarity of species composition between islands as  
108 a dependent variable and hypothetical biogeographic boundaries and environmental factors as  
109 explanatory variables. In the analyses, we focused on 14 islands in/around the Tokara  
110 Archipelago where the biogeographic boundary is assumed to lie: Tanegashima (Tane),  
111 Yakushima (Yaku), Kuchinoerabujima, Kuchinoshima, Nakanoshima, Gajajima, Tairajima,  
112 Suwanosejima, Akusekijima (Akuseki), Kodakarajima (Kodakara), Takarajima, Yokoatejima,  
113 Amamioshima (Amami) and Kikaijima (Table 1, Fig. 1). The taxonomic groups analysed in  
114 this study were land snails [26], ants [29], dragonflies [31], butterflies [32], amphibians [33–  
115 35], reptiles [33,36], birds [37–41] and plants [20], as comprehensive and detailed  
116 distribution datasets (presence/absence) on each island were available. Uncertain occurrences  
117 and artificial introductions were excluded from the datasets. For birds, only the species  
118 breeding on each island were considered in the distribution dataset.

119 We first investigated the relationship between species number and island area. A  
120 simple linear regression analysis based on log-normalized species number as a dependent  
121 variable and log-normalized island area (km<sup>2</sup>) as an explanatory variable was conducted  
122 using the `lm()` function of the *stats* R package.

123 From the presence/absence datasets of each taxonomic group, pairwise dissimilarity  
124 matrices between islands were generated based on three indices, Sørensen, Simpson and  
125 nestedness-resultant dissimilarities, using the *betapart* R package [42]. Sørensen dissimilarity  
126 evaluates the overall difference between communities based on species composition ( $\beta_{sor}$ ).  
127 The difference between species assemblages, however, results from two distinct situations  
128 that the Sørensen dissimilarity index cannot distinguish: (1) differences in assemblages  
129 caused by species replacement between communities (spatial turnover:  $\beta_{sim}$ ) and (2)  
130 differences in assemblages caused by differences in species richness (species loss or  
131 nestedness-resultant difference:  $\beta_{nes}$ ). Therefore,  $\beta_{sim}$  and  $\beta_{nes}$  were further estimated using  
132 Simpson dissimilarity and nestedness-resultant dissimilarity indices, respectively. Using the  
133 *vegan* R package [43], the dissimilarities were visualized in the form of an unrooted  
134 dendrogram.

135 As explanatory variables, seven hypothetical biogeographic boundaries lying between  
136 the islands (gaps 1–7 in Fig. 1) were used to examine the significance of the Tokara gap  
137 between Akuseki and Kodakara Islands (gap 5 in Fig. 1). Dummy pairwise distance matrices  
138 were generated based for each hypothetical boundary in which the distances between islands  
139 on the same side of the boundary was given as 0 and the distances between islands across the  
140 boundary was given as 1. Pairwise distance matrices of environmental variables, the highest  
141 point of island [ $\log_{10}(m)$ ], the geographic distance between the highest points of the islands  
142 (km), the land area of the island [ $\log_{10}(km^2)$ ], and the proportion of forest (%), were also  
143 included in the analyses to explain the correlation between the dissimilarity of species  
144 assemblages and environmental factors. These environmental variables were obtained from  
145 the National Land Information provided by the Ministry of Land, Infrastructure, Transport  
146 and Tourism, Japan. Temperature and precipitation are also important environmental  
147 variables that can affect the distribution of organisms and were included in the National Land

148 Information data; however, these were not included in our analyses because these variables  
149 were estimated from and correlated with other environmental variables such as the  
150 geographic distance or height of the island.

151 For the regression analyses, the multiple regression on distance matrices (MRM)  
152 function implemented in the *ecodist* R package was used [44]. MRM is an extension of the  
153 Mantel test and conducts linear regression analysis using distance matrices as dependent and  
154 explanatory variables. We first performed simple regression analyses using each of the seven  
155 hypothetical biogeographic boundaries or the five environmental variables as the only  
156 explanatory variable. We then performed multiple regression analysis using all five  
157 environmental variables as explanatory variables. All statistical analyses in this study were  
158 conducted in R version 3.3.1 [45].

159

## 160 **RESULTS**

### 161 **Definitions of the Watase line and the Tokara gap**

162 The Watase line was first proposed by Dr. Yaichiro Okada as a biogeographic boundary  
163 between the Palearctic and Oriental realms [13]. This boundary was named after Dr.  
164 Shozaburo Watase, who identified a boundary between Tane/Yaku Islands (Is. 1 and 2 in Fig.  
165 1) and Amami Island (Is. 13) based on termite fauna [46]. The biogeographic boundary  
166 between Tane/Yaku and Amami Islands was further supported by biogeographic studies on  
167 several animal taxa [13,47–49]. The Tokara Archipelago lying between Tane/Yaku and  
168 Amami islands was, however, not discussed in these articles. Because limited distribution  
169 information for the Tokara Archipelago was available in those days, and limited numbers of  
170 species were actually found in the archipelago, many biogeographers did not consider or  
171 could not determine which realm each island of the Tokara Archipelago belonged to  
172 [13,48,50,51].

173 We could not find the original article that first proposed the Tokara gap. However, the  
174 earliest articles using the term we found were Matsumoto et al. [52] and Kimura [53].  
175 Matsumoto et al. [52] gave a definition of the Tokara gap: a gap between oceanic ridges, the  
176 Tane/Yaku Spur and Amami Spur (Fig. 2). Between these spurs, there is a submarine canyon  
177 1000 m below sea level that is deep enough to remain under the sea surface throughout the  
178 glacial cycle. However, these spurs and the submarine canyon are distant from the Tokara  
179 Archipelago. More importantly, the Tokara gap is not a term for the biogeographical  
180 boundary but the name of a bathymetric feature.

181

### 182 **Usage of terms Watase line and Tokara gap**

183 Through a Google Scholar search, we found 108 journal articles in which the terms ‘Watase  
184 line’ and/or ‘Tokara gap’ were used. Among them, three contained these terms only in the  
185 reference list and were not considered in this study. The number of articles using these terms  
186 has increased exponentially (Fig. 3). Among the 105 journal articles, 13 mentioned both the  
187 Watase line and the Tokara gap, and 41 and 51 only mentioned the Watase line or the Tokara  
188 gap, respectively. All 64 articles that mentioned the Tokara gap were published after the  
189 1990s, and today the Tokara gap is a more frequently used term than the Watase line. Among  
190 the 105 articles, 24 put the Watase line or the Tokara gap between Akuseki and Kodakara  
191 Islands (gap 5 in Fig. 1) and nine put it another position within the Tokara Archipelago.

192 Among the 105 articles found by the Google Scholar search using ‘Watase line’  
193 and/or ‘Tokara gap’ as keywords, only a single study of flora expressly demonstrated the  
194 existence of a biogeographic boundary between Akuseki and Kodakara Islands, while five  
195 studies found little genetic differentiation between Akuseki and Kodakara populations of  
196 whip scorpions, tree frogs, skinks, cycads and madders [15,16,27,54,55]. The remaining



197 articles performed analyses based on large-meshed sampling skipping the Tokara  
198 Archipelago or did not explain the detailed position of the boundary.

199

## 200 **Spatial pattern of species diversity**

### 201 1. Number of species

202 The numbers of species in each taxon we collected for analyses were: 125 land snail species  
203 from 10 islands (mean species number per island  $\pm$  sd:  $32.3 \pm 15.8$ ), 123 ant species from 14  
204 islands ( $35.4 \pm 22.7$ ), 70 butterfly species from 13 islands ( $28.2 \pm 13.7$ ), 69 dragonfly species  
205 from 13 islands ( $19.2 \pm 15.6$ ), 17 amphibian species from 10 islands ( $3.1 \pm 3.3$ ), 31 reptile  
206 species from 14 islands ( $6.6 \pm 4.5$ ), 53 bird species from 11 islands ( $25.9 \pm 6.4$ ), and 1483  
207 plant species from 14 islands ( $429.2 \pm 285.2$ ) (Fig. 4).

208 Tane, Yaku and Amami Islands tended to harbour the largest numbers of species  
209 except for birds, whose species numbers were almost constant across the islands—around 30  
210 species (Fig. 4). Smaller islands including the Tokara Archipelago and Kuchinoerabujima  
211 and Kikaijima Islands, on the other hand, tended to harbour fewer species. A significant  
212 correlation between island size and the number of species was found for all taxa except birds  
213 ( $P < 0.05$ ,  $R^2 > 0.4$ ; Fig. 5).

214

### 215 2. Beta diversity

216 The dissimilarities of species assemblages between islands varied greatly among taxa and the  
217 three dissimilarity indices (Additional file 1). These results imply that both spatial-turnover  
218 and species-loss significantly contributed to the spatial pattern of species diversity. As  
219 expected, for instance, the lower numbers of bird species on Gajajima, Kodakarajima and  
220 Yokoatejima Islands (Islands 6, 10 and 12 in Fig. 4) was clearly expressed in the nestedness-

221 resultant dissimilarity ( $\beta_{nes}$ ) while the Simpson dissimilarity ( $\beta_{sim}$ ) was seemingly less  
222 affected by the number of species (Additional file 1).

223 In our regression analyses, all seven hypothetical gaps placed in/around the Tokara  
224 Archipelago showed significantly positive effects on the dissimilarity of at least a single  
225 taxon as follows: gaps 1, 2, 3, 5 and 6 (7) for snails (gaps 6 and 7 are substantially identical  
226 because Yokoatejima Is. was ignored), gaps 4, 5, 6 and 7 for ants, gaps 1, 2 and 3 for  
227 butterflies, gaps 1, 2 and 6 (7) for amphibians, gaps 1, 2, 3, 4, 5 and 6 for reptiles, gaps 1 and  
228 6 for birds and gaps 4, 5 and 6 for plants (for full information, see Additional file 2).

229 Although many combinations of gaps and beta diversity patterns of taxa showed significant  
230 correlations, the determination coefficient ( $R^2$ ) was relatively small in most cases. For  
231 example, gap 5, which is referred to as the Watase line or the Tokara gap, showed an  $R^2$   
232 range of 0.05–0.2, except for reptiles (Table 2 and supplementary table). In reptiles, gap 5  
233 was significantly correlated to  $\beta_{sor}$  with the largest  $R^2$ , 0.31. Conversely, gap 1 showed larger  
234  $R^2$  values for amphibian and bird beta diversity patterns. Specifically, the correlations of gap  
235 1 to  $\beta_{sor}$  and  $\beta_{sim}$  for amphibians were  $R^2 = 0.59$  and 1.00, respectively.

236

#### 237 4. Environmental factors for the spatial pattern of species diversity

238 All four environmental variables used in this study showed significant effects on the  
239 dissimilarity of species assemblies for all taxa and dissimilarity indices (Table 3 and  
240 Additional file 2). Here, we mainly mention the results of analyses based on  $\beta_{sor}$  (for full  
241 results, see Additional file 2). In land snails, amphibians, birds and plants, the area and  
242 geographic distance of the islands showed significant positive correlations; in ants and  
243 reptiles, the area, geographic distance and forest cover of the islands showed significant  
244 positive correlations; in butterflies and dragonflies, the area of the islands showed a

245 significant positive correlation (Table 3). Throughout the taxa, the dissimilarity of island area  
246 was positively correlated with overall species dissimilarity ( $\beta_{\text{SOR}}$ ).

247         However, the determination coefficients ( $R^2$ ) for each environmental variable varied  
248 among taxa. In land snails, the geographic distance of the islands was significantly correlated  
249 with  $\beta_{\text{SOR}}$  with the highest  $R^2$  (0.44). The regression analysis based on  $\beta_{\text{SIM}}$  and geographic  
250 distance showed a larger  $R^2$  (0.71). In ants, all simple regression analyses showed relatively  
251 small  $R^2$  values. The multiple regression analysis based on  $\beta_{\text{SOR}}$  and all four environmental  
252 variables showed a larger  $R^2$  of 0.45. Additionally, in butterflies and dragonflies, all  
253 regression analyses showed small  $R^2$  values. Even multiple regression analyses based on all  
254 four variables showed  $R^2$  values below 0.25. In amphibians, geographic distance showed the  
255 highest  $R^2$  (0.36), but this was smaller than the  $R^2$  of hypothetical gap 1 (0.59; Table 2).  
256 Similarly, in reptiles, geographic distance showed the highest  $R^2$  (0.39). In birds, the area and  
257 geographic distance of the islands showed the largest  $R^2$  values (0.44 and 0.42, respectively).  
258 In plants, the area of the islands showed the largest  $R^2$  (0.34).

259         The signs (positive/negative) of the correlation coefficients between island area and  
260  $\beta_{\text{SIM}}$  varied among taxa, even those showing  $P$  values lower than 0.05 (Additional file 2).  
261 However, these analyses tended to show smaller  $R^2$  values and/or correlation coefficients of  
262 almost zero, indicating they had no significant biogeographical implications.

263

## 264 **DISCUSSION**

### 265 **‘Watase line’ and ‘Tokara gap’ as terms**

266 Our documentary search revealed that the Watase line was proposed as a biogeographic  
267 boundary between Tane/Yaku and Amami Islands. On the other hand, the Tokara gap is the  
268 name of a bathymetric feature, a deep submarine canyon between Tane/Yaku and Amami  
269 Islands (Fig. 2). It is highly possible that the bathymetric feature that is the Tokara gap is

270 responsible for the biogeographic boundary of the Watase line; a sea barrier formed by the  
271 deep submarine canyon between the Tane/Yaku and Amami Spurs (the Tokara gap) inhibited  
272 the dispersal of terrestrial organisms for a long period, which led to the differentiation of  
273 fauna and flora between Tane/Yaku and Amami Islands (the Watase line).

274 Today, the Watase line (Tokara gap) is generally put between Akuseki and Kodakara  
275 Islands of the Tokara Archipelago, however, it seems incorrect because the Watase line was  
276 put between Tane/Yaku and Amami Islands and the Tokara Archipelago was not considered  
277 in the original article, and furthermore, the Tokara gap—a deep submarine canyon—does not  
278 lie between Akuseki and Kodakara Islands (Fig. 2). Through the document search in this  
279 study, we found three possible causes for the misplacement of the boundary; (1) the position  
280 of a sea strait, (2) the formation of a land bridge and (3) the distribution of pit vipers.

281 (1) In several biogeographic studies, it was noted that the Tokara strait (Tokara  
282 tectonic strait) lies between Akuseki and Kodakara Islands, and has acted as a geographical  
283 barrier to terrestrial organisms [16,20,56–60]. These studies declared that the barrier, the  
284 Tokara strait, has existed since the Pliocene, and referred to it as the Tokara gap (gap 5 in Fig.  
285 1). However, as mentioned above, the Tokara gap, the deep submarine canyon (–1000 m in  
286 depth), does not lie between Islands of the Tokara Archipelago. Furthermore, the position of  
287 the Tokara strait is not strictly defined but varies depending on the context [61].

288 (2) A land connection between Amami and Kodakara Islands has been depicted in the  
289 figures of several articles (e.g. Nakamura et al. 2012; Kumekawa et al. 2014). If the islands  
290 had any land connections, the terrestrial and freshwater biotas of Kodakara Island would  
291 share more species with Amami Island than with Akuseki Island. This paleogeographic  
292 inference should support the idea of a biogeographic boundary between Kodakara and  
293 Akuseki Islands. However, no evidence for the land bridge hypothesis was mentioned in their  
294 arguments. To our knowledge, the only geographic factor that implies a land bridge

295 connection between Amami and Kodakara Islands is the distribution of Ryukyu limestone.  
296 This is a reef-building limestone deposited during the Pleistocene, reflecting the expanse of  
297 shallow sea during the period. According to Kizaki [61] and Kato [63], this limestone is  
298 continuously distributed between Amami and Kodakara Islands, and was possibly deposited  
299 along a land bridge once formed between the islands. However, the distribution data for  
300 Ryukyu limestone have always been referred to as “unpublished data”, and we could not find  
301 any published articles that report the details of the data. Therefore, the land bridge hypothesis  
302 is unevaluable unless a study on the limestone distribution is published.

303 (3) The most symbolic and frequently referred to taxon that represents the existence  
304 of a biogeographic boundary is *Protobothrops*, a genus of venomous pit vipers in the Ryukyu  
305 Archipelago [64–66]. These pit vipers are widely distributed throughout the Ryukyu  
306 Archipelago, and Kodakara Island is the northernmost island on which a *Protobothrops*  
307 species is found [33]. Based on the vipers’ distribution, Hikida et al. [65] suggested the  
308 existence of a biogeographic boundary between Kodakara and Akuseki Islands. However, the  
309 distribution pattern varies among taxa even within snake species [33]. Although the  
310 distribution pattern of vipers suggests the existence of a geological or ecological barrier for  
311 vipers between Kodakara and Akuseki Islands, the idea cannot be applied to other organisms  
312 that have different ecological characters.

313 In addition, despite the growing number of articles that depict the boundary lying  
314 between Akuseki and Kodakara Islands (Fig. 3), few of them have investigated the  
315 biogeography using samples or data collected from the Tokara Archipelago. It means that, in  
316 most studies, the location of the biogeographic boundary was not important or it was just  
317 taken from other articles without verification. This could have enhanced the spread of the  
318 idea that the Tokara gap lies between Akuseki and Kodakara Islands.

319

## 320 **Biogeography in the Tokara Archipelago**

321 The regression analyses of species number and area of the islands showed clear positive  
322 correlation between them in all taxa except for bird (Fig. 5). This finding that larger islands  
323 harbour more species fits one of the general laws of island biogeography [2,3].

324 In our beta diversity analyses, all seven hypothetical gaps placed in/around the Tokara  
325 Archipelago showed significantly positive effects on the dissimilarity of at least a single  
326 taxon (Table 2 and Additional file 2). Although, no gaps showed significant effects across all  
327 eight taxa. These results suggest that there is no prominent biogeographic boundary around  
328 the Tokara Archipelago, but that the biota changes gradually on a spatial scale. The Watase  
329 line or the Tokara gap misplaced between Akuseki and Kodakara Islands does not represent  
330 the biogeographic patterns of fauna and flora in this region.

331 The beta diversity pattern of amphibians was largely shaped by the distribution of *B.*  
332 *japonica*; thus, gap 1, which corresponds to the northern limit of the distribution, should well  
333 explain the beta diversity pattern of amphibians. Conversely, except for ants and amphibians,  
334 a single environmental variable could explain the beta diversity pattern better than any  
335 hypothetical gap considered in this study, showing larger determination coefficients ( $R^2$ )  
336 (Table 3 and Additional file 2). In addition, multiple regression analysis applying all four  
337 environmental variables showed an  $R^2$  larger than that of any hypothetical gap in ants. In  
338 particular, it is obvious that the areas and geographic distances of the islands are determining  
339 factors for the beta diversity patterns of the fauna and flora in this region (Table 3),  
340 suggesting that the spatial pattern of species diversity in this region obeys the principles of  
341 island biogeography, distance decay and the species–area relationship, rather than the  
342 misplaced historical biogeographic boundary, the Tokara gap.

343

## 344 **Effects of preconception on the biogeographic debates**

345 Several biogeographic studies have performed beta diversity analyses based on the fauna and  
346 flora of the Ryukyus including the Tokara Archipelago, and demonstrated the presence of a  
347 major biogeographic boundary between Akuseki and Kodakara Islands. However, our  
348 analyses of beta diversity in the Tokara Archipelago did not support this idea. Here, we  
349 compare and discuss the discordance between present and previous studies.

350 Ichikawa et al. [26] argued that the Watase line (gap 5), which was put between  
351 Akuseki and Kodakara Islands, had a significant effect on snail diversity. However, as  
352 clarified above, this is not the sole boundary that shapes the spatial pattern of species  
353 diversity for snails. Hirao et al. [32] analysed the association of the spatial pattern of butterfly  
354 fauna to the Tokara gap (gap 5) and the Kerama gap—which is placed in the southern  
355 Ryukyus. They showed that these gaps had a significant effect on the butterfly fauna,  
356 especially on the nestedness dissimilarity. In our analysis, in contrast, a significant effect was  
357 not found for gap 5. This could be due to differences in analysis: we only focused on the  
358 islands in/around the Tokara Archipelago and the Tokara gap whereas Hirao et al. [32]  
359 studied the entire region of the Ryukyu Archipelago and simultaneously analysed the effects  
360 of both the Tokara and Kerama gaps. In the analyses based on reptile distribution, six  
361 hypothetical gaps showed significant effects. Eleven reptile species are distributed on nine  
362 islands of the Tokara Archipelago, and six islands represent the northern/southernmost  
363 populations of eight species [33,36]. Therefore, almost every hypothetical gap (gaps 1–6)  
364 corresponds to the distribution boundary of a certain reptile species. As stated above, the pit  
365 viper genus *Protobothrops*, the northern distribution limit of which is Kodakara Island, is a  
366 key genus supporting the idea of a biogeographic boundary between Akuseki and Kodakara  
367 Islands [64–66]; however, another species shows a different position as the distribution limit.  
368 Nakamura et al. [20] and Kubota et al. [25] investigated the correlation between the Tokara  
369 gap (gap 5) and the spatial pattern of flora in the Ryukyu Archipelago, and demonstrated that

370 the gap had a significant effect on the flora pattern. They suggested that the large floristic  
371 difference between Akuseki and Kodakara Islands implies the existence of a historical barrier,  
372 the Tokara gap. However, again, this is not the sole boundary; three hypothetical boundaries  
373 analysed in this study showed significant contributions to the floristic differentiation among  
374 islands of the Tokara Archipelago.

375 It is noteworthy that all hypothetical boundaries examined in our analyses had a  
376 significant effect on the beta diversity pattern, while the abovementioned studies focused on  
377 just one of them, between Akuseki and Kodakara Islands. Thus, it is highly possible that their  
378 arguments were strongly biased by the preconception that the boundary lay between Akuseki  
379 and Kodakara Islands.

380

## 381 **CONCLUSIONS**

382 Neither our document search nor our biogeographic analyses supported the presence of a  
383 clear biogeographic boundary between Akuseki and Kodakara Islands. Our biogeographic  
384 analyses suggested that the biota varies among islands, and a sea strait between Akuseki and  
385 Kodakara Islands could only partially explain the beta diversity pattern of this region. In  
386 other words, the Tokara Archipelago cannot be simply dichotomized into Palearctic and  
387 Oriental realms. The widespread idea of a biogeographic boundary (the Watase line or the  
388 Tokara gap) between Akuseki and Kodakara Islands is baseless, and we discourage  
389 biogeographic reconstruction relying on this misconception. Furthermore, the islands of the  
390 Tokara Archipelago are thought to be oceanic islands that never had land-bridge connections  
391 to other islands because they are volcanic in origin and developed from the deep sea floor  
392 [66,67]. In this case, the biota in the Tokara Archipelago should have never been affected by  
393 a geohistory of land-bridge formation and submergence, but consists of species that achieved  
394 dispersal over the sea. At present, it is adequate to put the boundary between Tane/Yaku and



395 Amami Islands, and the Tokara Archipelago seems to be a gap between the Palearctic and  
396 Oriental realms.

397 Besides demonstrating the necessity for revision of the biogeography in the Tokara  
398 Archipelago, this study demonstrates the pitfalls and risks of preconception in biogeographic  
399 debate. Specifically, it reveals a vicious cycle: preconception affects the design or  
400 interpretation of biogeographic analyses and subsequent biased results further perpetuate this  
401 preconception.

402 **DECLARATIONS**

403 **Ethics approval and consent to participate**

404 Not applicable.

405

406 **Consent for publication**

407 Not applicable.

408

409 **Availability of data and material**

410 The datasets used in this study are available from articles or public database referred in this  
411 manuscript.

412

413 **Competing interests**

414 The authors declare that they have no competing interests.

415

416 **Funding**

417 Not applicable.

418

419 **Authors' contributions**

420 S.K. conceived the study; S.K. and T.I. collected documents; S.K. compiled and analysed  
421 data; S.K. led the writing and T.I. reviewed the manuscript.

422

423 **Acknowledgements**

424 The authors are grateful to Prof. Koji Tojo (Shinshu University), Dr. Yuh Shiwa (Iwate  
425 Medical University) and Dr. Ryohei Furukawa (Iwate Medical University) for their  
426 assistance with data collection and analyses.

427 **REFERENCES**

- 428 1. Nekola JC, White PS. The distance decay of similarity in biogeography and ecology. *J*  
429 *Biogeogr.* 1999;26:867–78.
- 430 2. Storch D, Keil P, Jetz W. Universal species–area and endemics–area relationships at  
431 continental scales. *Nature*. Nature Publishing Group; 2012;488:78–81.
- 432 3. Whittaker RJ, Triantis KA. The species–area relationship: An exploration of that  
433 “most general, yet protean pattern.” *J Biogeogr.* 2012;39:623–6.
- 434 4. Molina-Venegas R, Aparicio A, Lavergne S, Arroyo J. The building of a biodiversity  
435 hotspot across a land-bridge in the Mediterranean. *Proc R Soc B Biol Sci.*  
436 2015;282:20151116.
- 437 5. Xiang Q-Y (Jenny), Soltis DE. Dispersal vicariance analyses of intercontinental  
438 disjuncts: historical biogeographical implications for angiosperms in the northern  
439 hemisphere. *Int J Plant Sci.* 2001;162:S29–39.
- 440 6. Grismer JL, Schulte JA, Alexander A, Wagner P, Travers SL, Buehler MD, et al. The  
441 Eurasian invasion: phylogenomic data reveal multiple Southeast Asian origins for  
442 Indian Dragon Lizards. *BMC Evol Biol.* 2016;16:43.
- 443 7. Fattorini S. Influence of recent geography and paleogeography on the structure of  
444 reptile communities in a land-bridge archipelago. *J Herpetol.* 2010;44:242–52.
- 445 8. Suzuki T, Kitano T, Tojo K. Contrasting genetic structure of closely related giant  
446 water bugs: Phylogeography of *Appasus japonicus* and *Appasus major* (Insecta:  
447 Heteroptera, Belostomatidae). *Mol Phylogenet Evol.* 2014;72:7–16.
- 448 9. Ota H. Geographic patterns of endemism and speciation in amphibians and reptiles of  
449 the Ryukyu Archipelago, Japan, with special reference to their paleogeographical  
450 implications. *Res Popul Ecol (Kyoto).* 1998;40:189–204.
- 451 10. Motokawa M, Kajihara H. *Species Diversity of Animals in Japan*. Tokyo: Springer

- 452 Japan; 2017.
- 453 11. Tojo K, Sekiné K, Takenaka M, Isaka Y, Komaki S, Suzuki T, et al. Species diversity  
454 of insects in Japan: Their origins and diversification processes. Entomol Sci. 2017;in  
455 press.
- 456 12. Narita S, Nomura M, Kato Y, Fukatsu T. Genetic structure of sibling butterfly species  
457 affected by *Wolbachia* infection sweep: evolutionary and biogeographical implications.  
458 Mol Ecol. 2006;15:1095–108.
- 459 13. Okada Y. A study on the distribution of tailless batrachians of Japan. Annot Zool Jpn.  
460 1927;11:137–43.
- 461 14. Kawamura A, Chang CH, Kawamura Y. Middle Pleistocene to Holocene mammal  
462 faunas of the Ryukyu Islands and Taiwan: An updated review incorporating results of  
463 recent research. Quat Int. 2016;397:117–35.
- 464 15. Kurita K, Hikida T. Divergence and long-distance overseas dispersals of island  
465 populations of the Ryukyu five-lined skink, *Plestiodon marginatus* (Scincidae:  
466 Squamata), in the Ryukyu Archipelago, Japan, as revealed by mitochondrial DNA  
467 phylogeography. Zoolog Sci. 2014;31:187–94.
- 468 16. Nakamura K, Denda T, Kokubugata G, Suwa R, Yang TYA, Peng CI, et al.  
469 Phylogeography of *Ophiorrhiza japonica* (Rubiaceae) in continental islands, the  
470 Ryukyu Archipelago, Japan. J Biogeogr. 2010;37:1907–18.
- 471 17. Kojima S, Kamimura S, Iijima A, Kimura T, Kurozumi T, Furota T. Molecular  
472 phylogeny and population structure of tideland snails in the genus *Cerithidea* around  
473 Japan. Mar Biol. 2006;149:525–35.
- 474 18. Yamaji T, Ishikawa T, Nomura M. Intraspecific Variation of *Eysarcoris guttigerus*  
475 (Hemiptera: Pentatomidae) in Japanese Southwest Population Based on Mitochondrial  
476 DNA. J Insect Sci. 2016;16:1–7.

- 477 19. Novković B, Kimura MT. Phylogeography, interaction patterns and the evolution of  
478 host choice in *Drosophila*-parasitoid systems in Ryukyu Archipelago and Taiwan.  
479 PLoS One. 2015;10:e0129132.
- 480 20. Nakamura K, Suwa R, Denda T, Yokota M. Geohistorical and current environmental  
481 influences on floristic differentiation in the Ryukyu Archipelago, Japan. J Biogeogr.  
482 2009;36:919–28.
- 483 21. Nishizawa T, Kurabayashi A, Kunihara T, Sano N, Fujii T, Sumida M. Mitochondrial  
484 DNA diversification, molecular phylogeny, and biogeography of the primitive  
485 rhacophorid genus *Buergeria* in East Asia. Mol Phylogenet Evol. 2011;59:139–47.
- 486 22. Takagi M. Vicariance and dispersal in the differentiation of vocalization in the Ryukyu  
487 Scops Owl *Otus elegans*. Ibis (Lond 1859). 2011;153:779–88.
- 488 23. Nakamura K, Denda T, Kokubugata G, Forster PI, Wilson G, Peng CI, et al. Molecular  
489 phylogeography reveals an antitropical distribution and local diversification of  
490 *Solenogyne* (Asteraceae) in the Ryukyu Archipelago of Japan and Australia. Biol J  
491 Linn Soc. 2012;105:197–217.
- 492 24. Okuyama Y. *Mitella amamiana* sp. nov., the first discovery of the genus *Mitella*  
493 (Saxifragaceae) in the central Ryukyus. Acta Phytotaxon Geobot. 2016;67:17–27.
- 494 25. Kubota Y, Hirao T, Fujii S, Murakami M. Phylogenetic beta diversity reveals  
495 historical effects in the assemblage of the tree floras of the Ryukyu Archipelago. J  
496 Biogeogr. 2011;38:1006–8.
- 497 26. Ichikawa S, Nakashima T, Katanoda Y, Tomiyama K. The biogeographical studies of  
498 land snail fauna in Tokara Islands, Japan. Bull Biogeogr Soc Japan. 2014;69:23–36.
- 499 27. Tominaga A, Matsui M, Eto K, Ota H. Phylogeny and Differentiation of Wide-  
500 Ranging Ryukyu Kajika Frog *Buergeria japonica* (Amphibia: Rhacophoridae):  
501 Geographic Genetic Pattern Not Simply Explained by Vicariance Through Strait

- 502 Formation. *Zoolog Sci.* 2015;32:240–7.
- 503 28. Blundo C, González-Espinosa M, Malizia LR. Relative contribution of niche and  
504 neutral processes on tree species turnover across scales in seasonal forests of NW  
505 Argentina. *Plant Ecol.* 2016;217:359–68.
- 506 29. Wepfer PH, Guénard B, Economo EP. Influences of climate and historical land  
507 connectivity on ant beta diversity in East Asia. *J Biogeogr.* 2016;43:2311–2321.
- 508 30. Baselga A, Leprieur F. Comparing methods to separate components of beta diversity.  
509 *Methods Ecol Evol.* 2015;6:1069–79.
- 510 31. Ozono A, Kawashima I, Futahashi R. *Dragonflies of Japan*. Tokyo, Japan: Bun-ichi  
511 Sogo Shuppan; 2012.
- 512 32. Hirao T, Kubota Y, Murakami M. Geographical patterns of butterfly species diversity  
513 in the subtropical Ryukyu Islands: The importance of a unidirectional filter between  
514 two source islands. *J Biogeogr.* 2015;42:1418–30.
- 515 33. Maenosono T, Toda M. Distributions of amphibians and terrestrial reptiles in the  
516 Ryukyu Archipelago: A review of published records. *Akamata.* 2007;18:28–46.
- 517 34. Matsui M. On the brown frogs from the Ryukyu Archipelago, Japan, with descriptions  
518 of two new species (Amphibia, Anura). *Curr Herpetol.* 2011;30:111–28.
- 519 35. Kuramoto M, Satou N, Oumi S, Kurabayashi A, Sumida M. Inter- and intra- island  
520 divergence in *Odorrana ishikawae* (Anura, Ranidae) of the Ryukyu Archipelago of  
521 Japan, with description of a new species. *Zootaxa.* 2011;2767:25–40.
- 522 36. Kurita K, Hikida T. A new species of *Plestiodon* (Squamata: Scincidae) from  
523 Kuchinoshima Island in the Tokara Group of the Northern Ryukyus, Japan. *Zoolog Sci.*  
524 2014;31:464–74.
- 525 37. Yamamoto Y. An ecological survey of birds in winter on Nakanoshima in the Tokara  
526 Islands (2). *Bull Kaogshima Prefectual museum.* 1998;17:34–38.

- 527 38. Yamamoto Y. Ecological survey of birds in winter in Nakanoshima, Tokara Islands.  
528 Bull Kaogshima Prefectual museum. 1997;16:49–52.
- 529 39. Morioka H. Breeding birds of the Tokara Islands and their origin. Mem Natl Museum  
530 Nat Sci. 1990;23:151–66.
- 531 40. Seki S-I, Tokorozaki S, Mizoguchi F, Takagi S, Nakamura N, Crystal F. Avifauna of  
532 the Tokara Islands, northern Ryukyu Archipelago. Bull FFPRI. 2011;10:183–229.
- 533 41. Takagi M. Avifauna of the Nansei Shoto (Southwest Islands), Japan, in relation to  
534 distances among islands. Japanese J Ornithol. 2005;54:1–22.
- 535 42. Baselga A, Orme CDL. Betapart: An R package for the study of beta diversity.  
536 Methods Ecol Evol. 2012;3:808–12.
- 537 43. Oksanen J, Blanchet FG, Friendly M, Kindt R, Legendre P, McGlinn D, et al. Vegan:  
538 Community Ecology Package. Version 2.4-1. 2016.
- 539 44. Goslee SC, Urban DL. The ecodist package for dissimilarity-based analysis of  
540 ecological data. J Stat Softw. 2007;22:1–19.
- 541 45. R Core Team. R: A language and environment for statistical computing. R Foundation  
542 for Statistical Computing, Vienna, Austria; 2016.
- 543 46. Holmgren N. Die Termiten Japans. Annot Zool Jpn. 1912;8:107–36.
- 544 47. Kuroda N. The geographical distribution of Japanese birds. J Geog. 1925;37:369–80.
- 545 48. Esaki T. On the geographical distribution of insects in Japan, with some notes on its  
546 boundary lines. Zool Mag. 1921;33:444–66.
- 547 49. Maki M. A Monograph of the Snakes of Japan. Tokyo, Japan: Dai-ichi Shobo; 1931.
- 548 50. Takara T. Studies on the terrestrial snakes in the Ryukyu Archipelago. Sci Bull Div  
549 Agric Home Econ 7 Eng Univ Ryukyus. 1962;9:1–202.
- 550 51. Kuroda N. The Watase's line looking from the vertebrate distribution. Zool Mag.  
551 1931;43:172–5.

- 552 52. Matsumoto T, Kimura M, Nakamura A, Aoki M. Detailed bathymetric features of  
553 Tokara and Kerama Gaps in the Ryukyu Arc. *J Geog.* 1996;105:286–96.
- 554 53. Kimura M. Quaternary Paleogeography of the Ryukyu Arc. *J Geog.* 1996;105:259–85.
- 555 54. Karasawa S, Nagata S, Aoki J, Yahata K, Honda M. Phylogeographic Study of Whip  
556 Scorpions (Chelicerata: Arachnida: Thelyphonida) in Japan and Taiwan. *Zoolog Sci.*  
557 2015;32:352–63.
- 558 55. Kyoda S, Setoguchi H. Phylogeography of *Cycas revoluta* Thunb. (Cycadaceae) on the  
559 Ryukyu Islands: very low genetic diversity and geographical structure. *Plant Syst Evol.*  
560 2010;288:177–89.
- 561 56. Hiramatsu M, Ii K, Okubo H, Huang KL, Huang CW. Biogeography and origin of  
562 *Lilium longiflorum* and *L. formosanum* (Liliaceae) endemic to the Ryukyu Archipelago  
563 and Taiwan as determined by allozyme diversity. *Am J Bot.* 2001;88:1230–9.
- 564 57. Nakamura K, Denda T, Kokubugata G, Huang C-J, Peng C-I, Yokota M. Phylogeny  
565 and biogeography of the *Viola iwagawae-tashiroi* species complex (Violaceae, section  
566 *Plagiostigma*) endemic to the Ryukyu Archipelago, Japan. *Plant Syst Evol.*  
567 2015;301:337–351.
- 568 58. Toda M, Nishida M, Matsui M, Wu G-F, Ota H. Allozyme variation among east asian  
569 populations of the Indian rice frog *Rana limnocharis* (Amphibia: Anura). *Biochem*  
570 *Syst Ecol.* 1997;25:143–59.
- 571 59. Kato J, Ota H, Hikida T. Biochemical systematics of the *Laticutatus* species-group of  
572 the genus *Eumeces* (Scincidae: Reptilia) from East Asian Islands. *Biochem Syst Ecol.*  
573 1994;22:491–500.
- 574 60. Ota H, Miyaguni H, Hikida T. Geographic Variation in the Endemic Skink,  
575 *Ateuchosaurus pellopleurus* from the Ryukyu Archipelago, Japan. *J Herpetol.*  
576 1999;33:106–18.



- 577 61. Kizaki K. Geology of the Ryukyu Archipelago. Okinawa, Japan: Okinawa Times;  
578 1985.
- 579 62. Kumekawa Y, Ito K, Tsurusaki N, Hayakawa H, Ohga K, Yokoyama J, et al.  
580 Phylogeography of the laniatorid harvestman *Pseudobiantes japonicus* and its allied  
581 species (Arachnida: Opiliones: Laniatores: Epedanidae). *Ann Entomol Soc Am.*  
582 2014;107:756–72.
- 583 63. Kato Y. Watase's line in the light of geology. *Nat Hist Japan.* 1989;3:14–18.
- 584 64. Hanzawa S. Topography and geology of the Riukiu Islands. *Sci reports Tohoku Imp*  
585 *Univ 2nd Ser Geol.* 1935;17:1–61.
- 586 65. Hikida T, Ota H, Toyama M. Herpetofauna of an encounter zone of Oriental and  
587 Palearctic elements: amphibians and reptiles of the Tokara group and adjacent islands  
588 in the Northern Ryukyus, Japan. *Biol Mag Okinawa.* 1992;30:29–43.
- 589 66. Osozawa S, Shinjo R, Armid A, Watanabe Y, Horiguchi T, Wakabayashi J.  
590 Palaeogeographic reconstruction of the 1.55 Ma synchronous isolation of the Ryukyu  
591 Islands, Japan, and Taiwan and inflow of the Kuroshio warm current. *Int Geol Rev.*  
592 2012;54:1369–88.
- 593 67. Yokose H, Sato H, Fujimoto Y, Mirabueno MHT, Kobayashi T, Akimoto K, et al.  
594 Mid-Pleistocene submarine acidic volcanism of the Tokara Islands, Japan. *J Geog.*  
595 2010;119:46–68.

596 **FIGURE TITLES & LEGENDS**

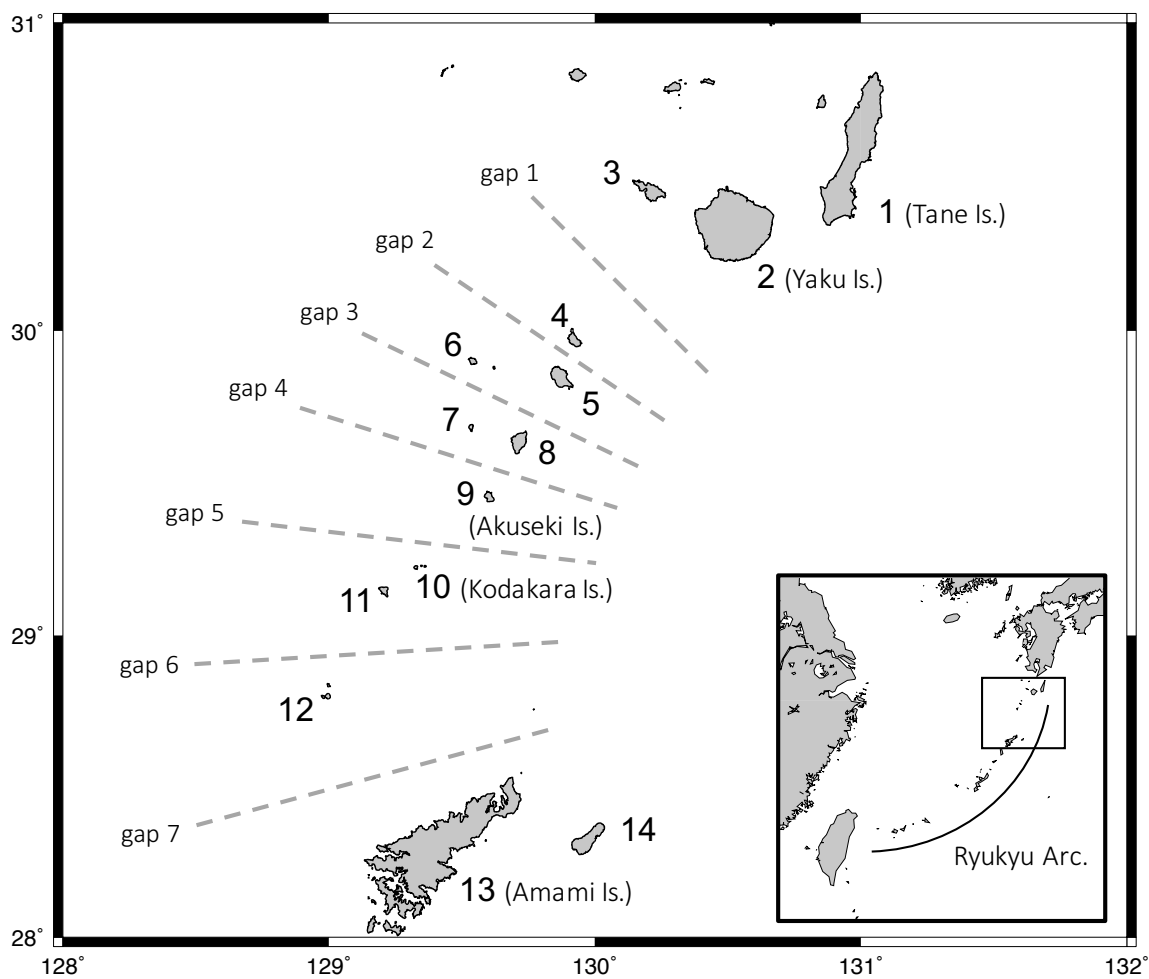

597

598 **Fig. 1.** The Tokara Archipelago and adjacent islands. Gaps 1–7 (dashed lines) are  
599 hypothetical biogeographic boundaries considered in our analyses. Island numbers  
600 correspond to those in Table 1.

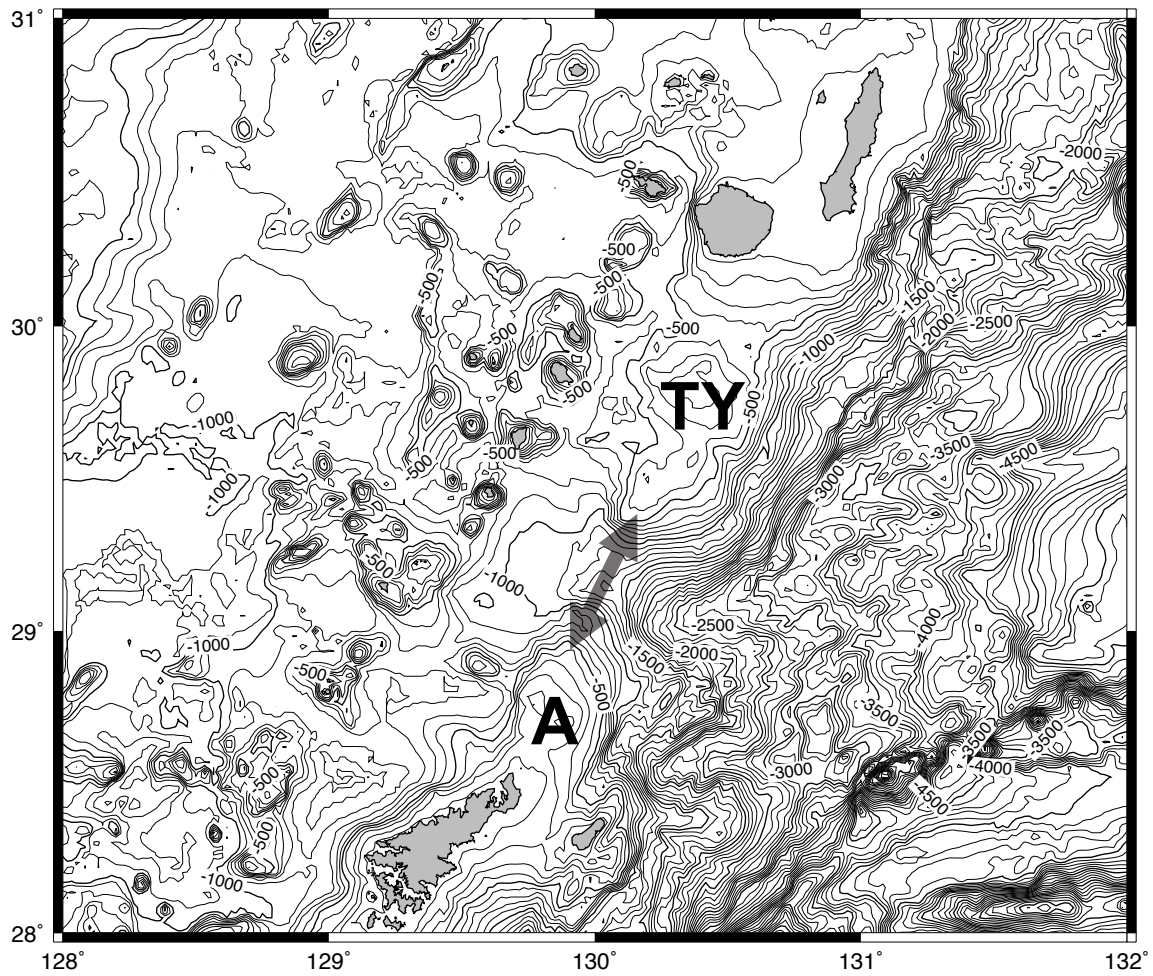

601

602 **Fig. 2.** Bathymetric map around the Tokara Archipelago. The arrow represents the Tokara  
 603 gap, which corresponds to the Watase line. TY: Tane/Yaku Spur, A: Amami Spur.

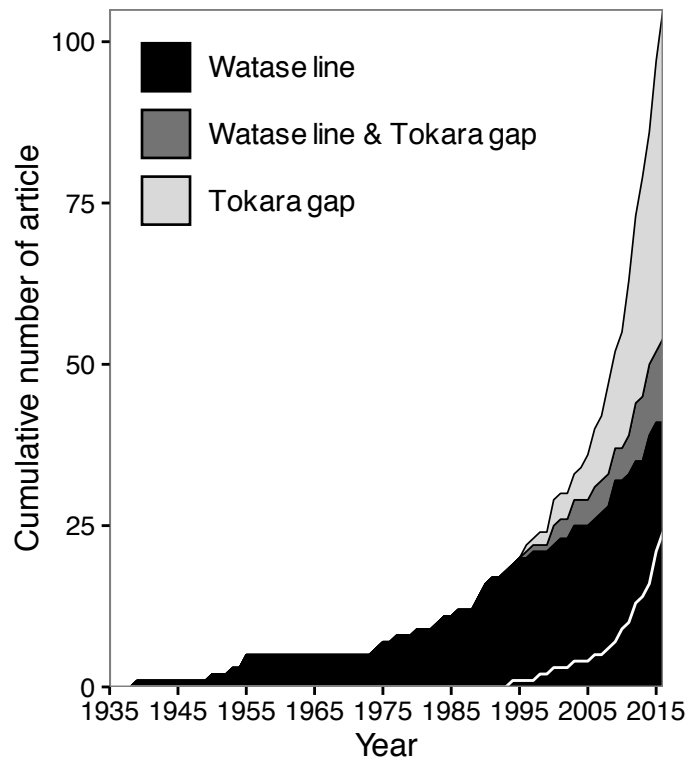

604

605 **Fig. 3.** Cumulative number of journal articles in which the terms ‘Watase line’ and/or  
 606 ‘Tokara gap’ are used. The white line represents the cumulative number of articles that put  
 607 the biogeographic boundary between Akusekijima and Kodakarajima Islands (gap 5 in Fig. 1).

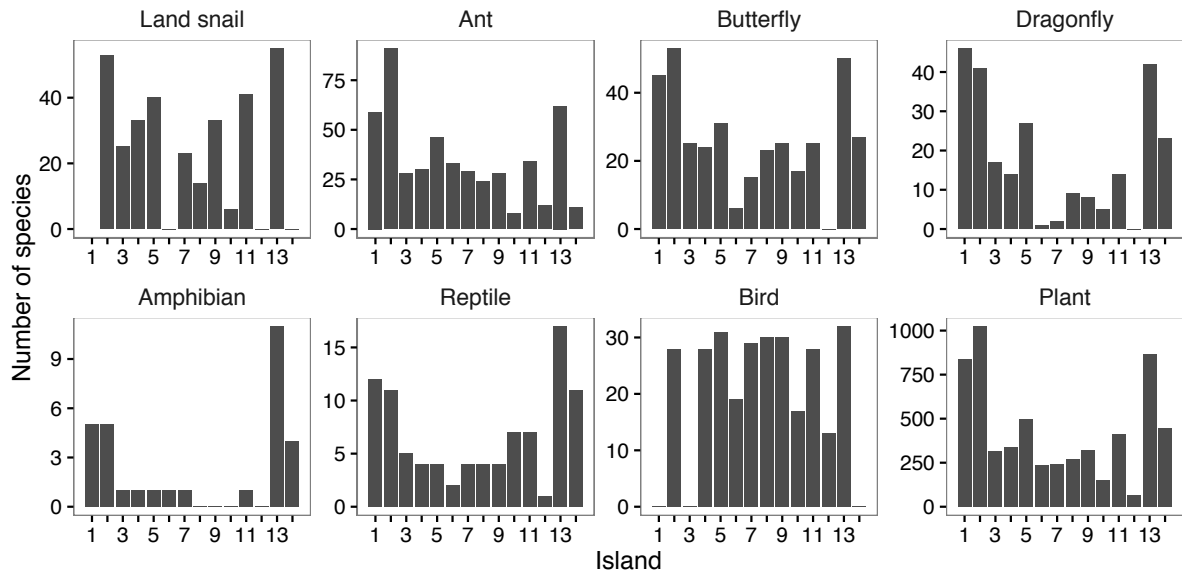

608

609 **Fig. 4.** Number of species in each taxon on each island. For both islands for which no  
 610 distribution data were available and islands on which no species are distributed, the species  
 611 number is given as 0. Island numbers correspond to those in Table 1 and Fig. 1.

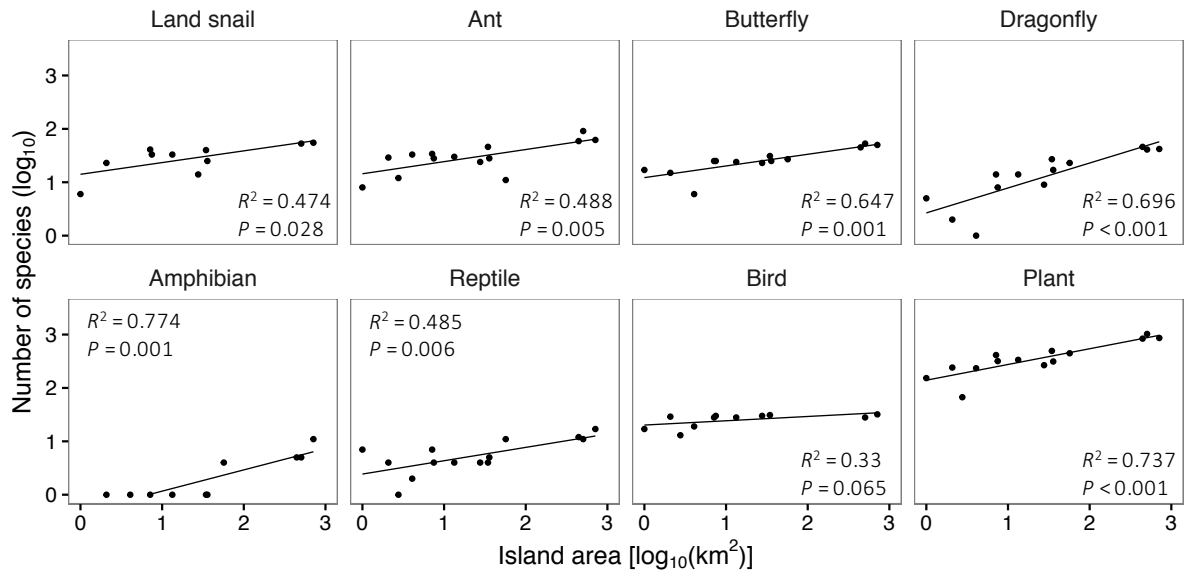

612

613 **Fig. 5.** Correlation between island area and species number on the island for each taxon.

614 Regression lines are also presented.

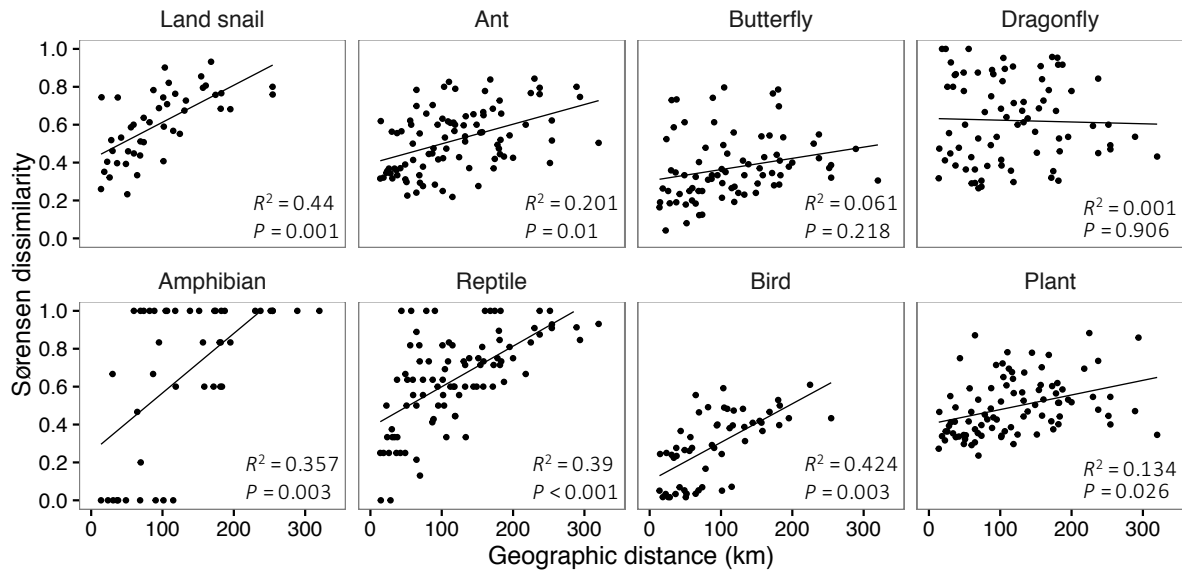

615

616 **Fig. 6.** Correlation between geographic distance and Sørensen dissimilarity for each taxon.

617 Regression lines are also presented.

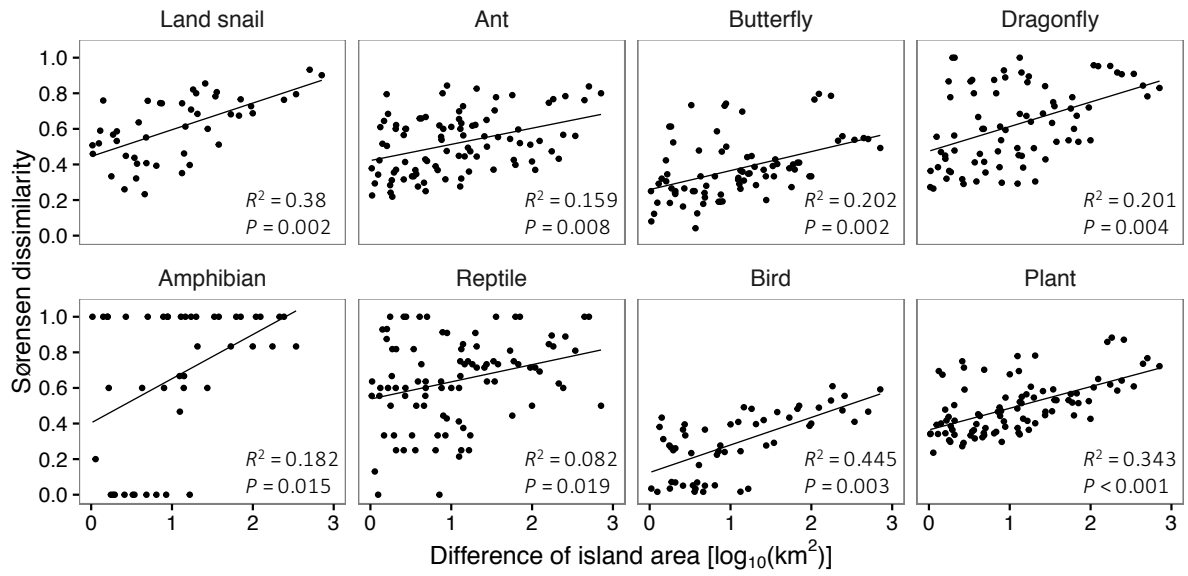

618

619 **Fig. 7.** Correlation between the difference of island area and Sørensen dissimilarity for each

620 taxon. Regression lines are also presented.



621 **TABLES**622 **Table 1.** Positions and environmental variables of each island studied.

|    | Island           | Latitude (N) | Longitude (E) | Area (km <sup>2</sup> ) | Elevation (m) | Forest cover (%) |
|----|------------------|--------------|---------------|-------------------------|---------------|------------------|
| 1  | Tanegashima      | 30.74361     | 131.0533      | 445                     | 282           | 54.4             |
| 2  | Yakushima        | 30.33611     | 130.5042      | 504.9                   | 1936          | 89.7             |
| 3  | Kuchinoerabujima | 30.44333     | 130.2172      | 35.81                   | 657           | 86.3             |
| 4  | Kuchinoshima     | 29.96806     | 129.9256      | 13.33                   | 628           | 77.1             |
| 5  | Nakanoshima      | 29.85917     | 129.8569      | 34.47                   | 979           | 77.4             |
| 6  | Gajajima         | 29.90306     | 129.5417      | 4.07                    | 497           | 78.1             |
| 7  | Tairajima        | 29.69177     | 129.5339      | 2.08                    | 243           | 81.9             |
| 8  | Suwanosejima     | 29.63833     | 129.7139      | 27.66                   | 799           | 60.1             |
| 9  | Akusekijima      | 29.465       | 129.5947      | 7.49                    | 584           | 81.3             |
| 10 | Kodakarajima     | 29.224       | 129.3274      | 1                       | 103           | 48               |
| 11 | Takarajima       | 29.14444     | 129.2081      | 7.14                    | 292           | 32.7             |
| 12 | Yokoatejima      | 28.80083     | 128.9947      | 2.76                    | 495           | 21.7             |
| 13 | Amamioshima      | 28.29611     | 129.3211      | 712.4                   | 694           | 65.2             |
| 14 | Kikaijima        | 28.3211      | 129.9799      | 56.93                   | 214           | 2.9              |

623 Island numbers correspond to those in Fig. 1.

624 **Table 2.** Results of MRM analyses of Sørensen dissimilarity and seven hypothetical gaps for  
 625 each taxon.

| Model |       | Land snail | Ant      | Butterfly | Dragonfly | Amphibian | Reptile   | Bird    | Plant   |
|-------|-------|------------|----------|-----------|-----------|-----------|-----------|---------|---------|
| gap 1 | coef  | 0.1279     | 0.0503   | 0.0915    | -0.0018   | 0.6181**  | 0.2006*   | 0.2460  | 0.0419  |
|       | $R^2$ | 0.1179     | 0.0214   | 0.0681    | 0.0000    | 0.5945    | 0.1551    | 0.2838  | 0.0179  |
| gap 2 | coef  | 0.0752     | 0.0204   | 0.0714    | -0.0145   | 0.2986*   | 0.1365*   | 0.0661  | 0.0138  |
|       | $R^2$ | 0.0442     | 0.0038   | 0.0436    | 0.0011    | 0.1388    | 0.0765    | 0.0303  | 0.0021  |
| gap 3 | coef  | 0.0595     | 0.0326   | 0.0662*   | 0.0353    | 0.0188    | 0.1244*   | -0.0078 | 0.0163  |
|       | $R^2$ | 0.0277     | 0.0097   | 0.0374    | 0.0063    | 0.0006    | 0.0643    | 0.0005  | 0.0029  |
| gap 4 | coef  | 0.0518     | 0.0698*  | -0.0105   | -0.0124   | 0.0585    | 0.2435*** | 0.0021  | 0.0391  |
|       | $R^2$ | 0.0210     | 0.0444   | 0.0009    | 0.0008    | 0.0053    | 0.2465    | 0.0000  | 0.0168  |
| gap 5 | coef  | 0.1615*    | 0.1123** | -0.0101   | -0.0348   | 0.0585    | 0.2716*** | 0.0618  | 0.0811* |
|       | $R^2$ | 0.2043     | 0.1154   | 0.0009    | 0.0062    | 0.0053    | 0.3073    | 0.0301  | 0.0725  |
| gap 6 | coef  | 0.2000*    | 0.1702*  | 0.0232    | -0.0328   | 0.2367    | 0.1266*   | 0.1968* | 0.1217* |
|       | $R^2$ | 0.2014     | 0.2450   | 0.0037    | 0.0045    | 0.0803    | 0.0618    | 0.2687  | 0.1509  |
| gap 7 | coef  | 0.2000*    | 0.1581*  | 0.0232    | -0.0328   | 0.2367    | 0.1399    | 0.2048  | 0.0361  |
|       | $R^2$ | 0.2014     | 0.1776   | 0.0037    | 0.0045    | 0.0803    | 0.0633    | 0.1966  | 0.0111  |

626 For the results using other dissimilarity indices, see Additional file 2. coef: coefficient. (\*  $P <$   
 627 0.05, \*\*  $P < 0.01$ , \*\*\*  $P < 0.001$ )

628 **Table 3.** Results of MRM analyses of Sørensen dissimilarity and environmental variables for  
 629 each taxon.

| Model       | Land snail | Ant      | Butterfly | Dragonfly | Amphibian | Reptile   | Bird     | Plant     |
|-------------|------------|----------|-----------|-----------|-----------|-----------|----------|-----------|
| Area coef   | 0.1499**   | 0.0909** | 0.1068**  | 0.1380**  | 0.2483*   | 0.0967*   | 0.1547** | 0.1216*** |
| $R^2$       | 0.3803     | 0.1590   | 0.2020    | 0.2008    | 0.1822    | 0.0820    | 0.4447   | 0.3426    |
| Height coef | 0.2525     | 0.2044   | 0.0220    | 0.0333    | 0.0329    | 0.1303    | 0.1337   | 0.0938    |
| $R^2$       | 0.1810     | 0.1083   | 0.0012    | 0.0017    | 0.0004    | 0.0200    | 0.0450   | 0.0274    |
| Forest coef | 0.0037     | 0.0033*  | -0.0006   | -0.0017   | 0.0007    | 0.0030*   | 0.0020   | 0.0016    |
| $R^2$       | 0.1005     | 0.2026   | 0.0072    | 0.0308    | 0.0019    | 0.0773    | 0.0448   | 0.0596    |
| Geodis coef | 0.0020***  | 0.0010*  | 0.0006    | -0.0001   | 0.0031**  | 0.0021*** | 0.0020** | 0.0008*   |
| $R^2$       | 0.4400     | 0.2009   | 0.0613    | 0.0009    | 0.3569    | 0.3902    | 0.4241   | 0.1338    |
| Area coef   | 0.0830*    | 0.0742** | 0.0978**  | 0.1620*** | 0.1770*   | 0.0228    | 0.1264** | 0.1262*** |
| Height coef | 0.0987     | 0.1142   | -0.0377   | -0.0753   | 0.1497    | 0.1083    | -0.0568  | -0.0220   |
| Forest coef | 0.0017     | 0.0028*  | -0.0005   | -0.0002   | -0.0029   | 0.0005    | 0.0009   | 0.0019    |
| Geodis coef | 0.0014**   | 0.0005   | 0.0004    | -0.0006   | 0.0033*** | 0.0020*** | 0.0012*  | 0.0001    |
| $R^2$       | 0.6491     | 0.4501   | 0.2259    | 0.2410    | 0.5034    | 0.4143    | 0.6138   | 0.4410    |

630 For the results using other dissimilarity indices, see Additional file 2. Geodis: geographic

631 distance, coef: coefficient. (\*  $P < 0.05$ , \*\*  $P < 0.01$ , \*\*\*  $P < 0.001$ )

632 **ADDITIONAL FILES**

633 **Additional file 1:** Dendrograms representing dissimilarity of species composition of land  
634 snail, ant, butterfly, dragonfly, amphibian, reptile, bird and plant on islands in/around the  
635 Tokara Archipelago. Sørensen, Simpson and nestedness-resultant dissimilarity indices were  
636 applied to estimate the dissimilarity. Numbers on each dendrogram represent the island  
637 number listed in Table 1 of this article. (file name: Additionalfile1.docx, file size: 465 kb)

638

639 **Additional file 2:** Results of simple and multiple regression analyses based on hypothetical  
640 gaps and environmental factors. (file name: Additionalfile2.xls, file size: 74 kb)
